# Supplementary material for: Microbial Community Changes in Silkworms Suspected of Septicemia and Identification of Serratia sp.
Source: MDPI journal article supplement (doi:10.3390/ijms25073957), 2024-04-02
Supplement: s1 [file s1]

# Microbial Community Changes in Silkworms Suspected of Septicemia and Identification of *Serratia* sp.

## Supplementary Material

Table S1. Raw data statistics

| Sample name | Total read bases (bp) | Total reads | GC (%) | AT (%) | Q20 (%) | Q30 (%) |
|-------------|-----------------------|-------------|--------|--------|---------|---------|
| Norm 1      | 66,619,728            | 221,328     | 52.90  | 47.10  | 91.15   | 81.47   |
| Norm 2      | 65,049,110            | 216,110     | 53.56  | 46.44  | 90.76   | 81.08   |
| Norm 3      | 45,110,870            | 149,870     | 53.05  | 46.95  | 90.65   | 80.97   |
| Sept 1      | 57,657,754            | 191,554     | 55.15  | 44.85  | 90.15   | 80.33   |
| Sept 2      | 67,107,348            | 222,948     | 55.02  | 44.80  | 91.05   | 81.34   |
| Sept 3      | 58,414,468            | 222,948     | 55.21  | 44.79  | 91.34   | 81.77   |

\*Total read bases: Total number of bases sequenced

\*Total reads: Total number of reads. For Illumina paired-end sequencing, this value refers to the sum of read 1 and read 2

\*GC(%): GC content

\*AT(%): AT content

\*Q20(%): Ratio of bases that have a phred quality score of over 20

\*Q30(%): Ratio of bases that have a phred quality score of over 30

Table S2. Preprocessing summary of trimmed and filtered read counts for each step.

| <b>Sample Name</b> | <b>Adapter and primer trimming</b> | <b>Quality filter</b> | <b>Denoised for</b> | <b>Denoised rev</b> | <b>Merged pair</b> | <b>Non-chimeric</b> |
|--------------------|------------------------------------|-----------------------|---------------------|---------------------|--------------------|---------------------|
| Norm 1             | 107,109                            | 91,969                | 91,570              | 91,741              | 90,786             | 74,562              |
| Norm 2             | 104,258                            | 87,783                | 87,717              | 87,739              | 87,510             | 85,796              |
| Norm 3             | 71,501                             | 60,519                | 60,461              | 60,480              | 60,335             | 60,208              |
| Sept 1             | 92,832                             | 75,956                | 75,867              | 75,948              | 75,848             | 75,680              |
| Sept 2             | 108,185                            | 91,166                | 91,146              | 91,128              | 91,064             | 90,406              |
| Sept 3             | 94,097                             | 80,268                | 80,181              | 80,265              | 80,125             | 79,870              |

Tools for analysis of adapter and primer trimming, Cutadapt; quality filtering, denoising, merging, and chimera removal, DADA2.

Table S3. Sample statistics estimated by ASV analysis corresponding to the six analyzed samples.

| Sample Name | ASVs  | Chao1  | Shannon | Gini-Simpson | Good's Coverage |
|-------------|-------|--------|---------|--------------|-----------------|
| Norm 1      | 126.0 | 126.71 | 2.16    | 0.64         | 0.99            |
| Norm 2      | 129.0 | 129.0  | 2.99    | 0.73         | 0.99            |
| Norm 3      | 81.0  | 81.0   | 2.75    | 0.70         | 1.0             |
| Sept 1      | 7.0   | 7.0    | 0.66    | 0.26         | 1.0             |
| Sept 2      | 8.0   | 8.0    | 0.71    | 0.2          | 1.0             |
| Sept 3      | 6.0   | 6.0    | 0.72    | 0.27         | 1.0             |

\* ASVs: amplicon sequence variant (ASV) is a term used to refer to single DNA sequences recovered from a high-throughput marker gene analysis.

\* Chao1: returns the Chao1 richness estimate for an ASV definition.

\* [Shannon](#): the Shannon index takes into account the number and evenness of species.

\* [Gini-Simpson](#): the Gini-Simpson index represents the probability that two randomly selected individuals in the habitat will belong to the same species.

\* Good's Coverage: coverage is calculated as  $C=1-(s/n)$ , where  $s$  is the number of unique ASVs and  $n$  is the number of individuals in the sample. This index provides a relative measure of how effectively the sample represents the larger environment.

|            |                                                               |      |
|------------|---------------------------------------------------------------|------|
| This_study | GCTGGCGGCGAGGCTTAACACATGCAAGTCGAGCGGTAGCACAGGGGAGCTTGCTCCCCGG | 60   |
| LC645982.1 | GCTGGCGGCGAGGCTTAACACATGCAAGTCGAGCGGTAGCACAGGGGAGCTTGCTCCCCGG | 60   |
| NR114043.1 | GCTGGCGGCGAGGCTTAACACATGCAAGTCGAGCGGTAGCACAGGGGAGCTTGCTCCCCGG | 60   |
| *****      |                                                               |      |
| This_study | GTGACGACGCGGCGGACGGGTGAGTAATGTCTGGGAAACTGCTGATGGAGGGGATAACT   | 120  |
| LC645982.1 | GTGACGACGCGGCGGACGGGTGAGTAATGTCTGGGAAACTGCTGATGGAGGGGATAACT   | 120  |
| NR114043.1 | GTGACGACGCGGCGGACGGGTGAGTAATGTCTGGGAAACTGCTGATGGAGGGGATAACT   | 120  |
| *****      |                                                               |      |
| This_study | ACTGGAAACGGTAGCTAATACCGCATAACGTCGCAAGACCAAGAGGGGGACCTTCGGGC   | 180  |
| LC645982.1 | ACTGGAAACGGTAGCTAATACCGCATAACGTCGCAAGACCAAGAGGGGGACCTTCGGGC   | 180  |
| NR114043.1 | ACTGGAAACGGTAGCTAATACCGCATAACGTCGCAAGACCAAGAGGGGGACCTTCGGGC   | 180  |
| *****      |                                                               |      |
| This_study | CTCTTGCCATCAGATGTGCCCAGATGGGATTAGCTAGTAGTGGGGTAATGGCTCACCTA   | 240  |
| LC645982.1 | CTCTTGCCATCAGATGTGCCCAGATGGGATTAGCTAGTAGTGGGGTAATGGCTCACCTA   | 240  |
| NR114043.1 | CTCTTGCCATCAGATGTGCCCAGATGGGATTAGCTAGTAGTGGGGTAATGGCTCACCTA   | 240  |
| *****      |                                                               |      |
| This_study | GGGACGATCCCTAGCTGGTCTGAGAGGATGACGAGCCACACTGGAACCTGAGACACGGTC  | 300  |
| LC645982.1 | GGGACGATCCCTAGCTGGTCTGAGAGGATGACGAGCCACACTGGAACCTGAGACACGGTC  | 300  |
| NR114043.1 | GGGACGATCCCTAGCTGGTCTGAGAGGATGACGAGCCACACTGGAACCTGAGACACGGTC  | 300  |
| *****      |                                                               |      |
| This_study | CAGACTCCTACGGGAGGACAGTGGGGAATATTGCACAATGGGCGCAAGCCTGATGCAG    | 360  |
| LC645982.1 | CAGACTCCTACGGGAGGACAGTGGGGAATATTGCACAATGGGCGCAAGCCTGATGCAG    | 360  |
| NR114043.1 | CAGACTCCTACGGGAGGACAGTGGGGAATATTGCACAATGGGCGCAAGCCTGATGCAG    | 360  |
| *****      |                                                               |      |
| This_study | CCATGCGCGGTGTGTGAAGAAGGCCCTTCGGGTTGTAAGCACCTTTCAGCGAGGAGGAAG  | 420  |
| LC645982.1 | CCATGCGCGGTGTGTGAAGAAGGCCCTTCGGGTTGTAAGCACCTTTCAGCGAGGAGGAAG  | 420  |
| NR114043.1 | CCATGCGCGGTGTGTGAAGAAGGCCCTTCGGGTTGTAAGCACCTTTCAGCGAGGAGGAAG  | 420  |
| *****      |                                                               |      |
| This_study | TGGTGAGCTTAATACGCTCATCAATTGACGTTACTCGCAGAAGAAGCACCGGCTAACTCC  | 480  |
| LC645982.1 | TGGTGAGCTTAATACGCTCATCAATTGACGTTACTCGCAGAAGAAGCACCGGCTAACTCC  | 480  |
| NR114043.1 | TGGTGAGCTTAATACGCTCATCAATTGACGTTACTCGCAGAAGAAGCACCGGCTAACTCC  | 480  |
| *****      |                                                               |      |
| This_study | GTGCCACGACCGCGGTAATACGGAGGGTGCACAGCSTTAATCGGAATTACTGGGCGTAAA  | 540  |
| LC645982.1 | GTGCCACGACCGCGGTAATACGGAGGGTGCACAGCSTTAATCGGAATTACTGGGCGTAAA  | 540  |
| NR114043.1 | GTGCCACGACCGCGGTAATACGGAGGGTGCACAGCSTTAATCGGAATTACTGGGCGTAAA  | 540  |
| *****      |                                                               |      |
| This_study | GCGCACGACGGCGGTTTGTAAAGTCAGATGTGAAATCCCGGGGCTCAACCTGGGAACCTGC | 600  |
| LC645982.1 | GCGCACGACGGCGGTTTGTAAAGTCAGATGTGAAATCCCGGGGCTCAACCTGGGAACCTGC | 600  |
| NR114043.1 | GCGCACGACGGCGGTTTGTAAAGTCAGATGTGAAATCCCGGGGCTCAACCTGGGAACCTGC | 600  |
| *****      |                                                               |      |
| This_study | ATTTGAAACTGGCAAGCTAGAGTCTCGTAGAGGGGGGTAGAAATCCAGGTGTAGCGGTGA  | 660  |
| LC645982.1 | ATTTGAAACTGGCAAGCTAGAGTCTCGTAGAGGGGGGTAGAAATCCAGGTGTAGCGGTGA  | 660  |
| NR114043.1 | ATTTGAAACTGGCAAGCTAGAGTCTCGTAGAGGGGGGTAGAAATCCAGGTGTAGCGGTGA  | 660  |
| *****      |                                                               |      |
| This_study | AATGCGTAGAGATCTGGAGGAATACCGGTGGCGAAGCGGCCCCCTGGACGAAGACTGAC   | 720  |
| LC645982.1 | AATGCGTAGAGATCTGGAGGAATACCGGTGGCGAAGCGGCCCCCTGGACGAAGACTGAC   | 720  |
| NR114043.1 | AATGCGTAGAGATCTGGAGGAATACCGGTGGCGAAGCGGCCCCCTGGACGAAGACTGAC   | 720  |
| *****      |                                                               |      |
| This_study | GCTCAGGTGCGAAAGCGTGGGGAGCAACAGGATTAGATACCCCTGGTAGTCCACGCTGTA  | 780  |
| LC645982.1 | GCTCAGGTGCGAAAGCGTGGGGAGCAACAGGATTAGATACCCCTGGTAGTCCACGCTGTA  | 780  |
| NR114043.1 | GCTCAGGTGCGAAAGCGTGGGGAGCAACAGGATTAGATACCCCTGGTAGTCCACGCTGTA  | 780  |
| *****      |                                                               |      |
| This_study | AACGATGTGATTTGGAGGTTGTGCCCTTGAGGCGTGGCTTCGGGAGCTAACGCGTTAAA   | 840  |
| LC645982.1 | AACGATGTGATTTGGAGGTTGTGCCCTTGAGGCGTGGCTTCGGGAGCTAACGCGTTAAA   | 840  |
| NR114043.1 | AACGATGTGATTTGGAGGTTGTGCCCTTGAGGCGTGGCTTCGGGAGCTAACGCGTTAAA   | 840  |
| *****      |                                                               |      |
| This_study | TCGACCGCTGGGGAGTACGCGCGCAAGGTTAAACTCAAATGAATTGACGGGGGCCCGC    | 900  |
| LC645982.1 | TCGACCGCTGGGGAGTACGCGCGCAAGGTTAAACTCAAATGAATTGACGGGGGCCCGC    | 900  |
| NR114043.1 | TCGACCGCTGGGGAGTACGCGCGCAAGGTTAAACTCAAATGAATTGACGGGGGCCCGC    | 900  |
| *****      |                                                               |      |
| This_study | ACAAGCGGTGGAGCATGTGTTTAATTCGATGCAACGCGAAGAACCTTACCTACTCTTGA   | 960  |
| LC645982.1 | ACAAGCGGTGGAGCATGTGTTTAATTCGATGCAACGCGAAGAACCTTACCTACTCTTGA   | 960  |
| NR114043.1 | ACAAGCGGTGGAGCATGTGTTTAATTCGATGCAACGCGAAGAACCTTACCTACTCTTGA   | 960  |
| *****      |                                                               |      |
| This_study | CATCCAGAGAACTTTCCAGAGATGGATTGTCCTTCGGGAACTCTGAGACAGGTGCTGC    | 1020 |
| LC645982.1 | CATCCAGAGAACTTTCCAGAGATGGATTGTCCTTCGGGAACTCTGAGACAGGTGCTGC    | 1020 |
| NR114043.1 | CATCCAGAGAACTTTCCAGAGATGGATTGTCCTTCGGGAACTCTGAGACAGGTGCTGC    | 1020 |
| *****      |                                                               |      |
| This_study | ATGGCTGTCGTAGCTCGTGTGTGAAATGTTGGGTTAAGTCCCGCAACGAGCGCAACCC    | 1080 |
| LC645982.1 | ATGGCTGTCGTAGCTCGTGTGTGAAATGTTGGGTTAAGTCCCGCAACGAGCGCAACCC    | 1080 |
| NR114043.1 | ATGGCTGTCGTAGCTCGTGTGTGAAATGTTGGGTTAAGTCCCGCAACGAGCGCAACCC    | 1080 |
| *****      |                                                               |      |
| This_study | TTATCCTTTGTGCCAGCGGTTTCGGCCGGGAACCTCAAAGGAGACTGCCAGTGATAAATG  | 1140 |
| LC645982.1 | TTATCCTTTGTGCCAGCGGTTTCGGCCGGGAACCTCAAAGGAGACTGCCAGTGATAAATG  | 1140 |
| NR114043.1 | TTATCCTTTGTGCCAGCGGTTTCGGCCGGGAACCTCAAAGGAGACTGCCAGTGATAAATG  | 1140 |
| *****      |                                                               |      |
| This_study | GAGGAAGG 1148                                                 |      |
| LC645982.1 | GAGGAAGG 1148                                                 |      |
| NR114043.1 | GAGGAAGG 1148                                                 |      |
| *****      |                                                               |      |

Figure S1. Sequence alignment analysis. Isolated bacteria (this study), *Serratia nematodiphila* (LC645982.1), *Serratia marcescens* (NR\_114043.1) were compared using Clustal Omega for the 16s rRNA region.

A

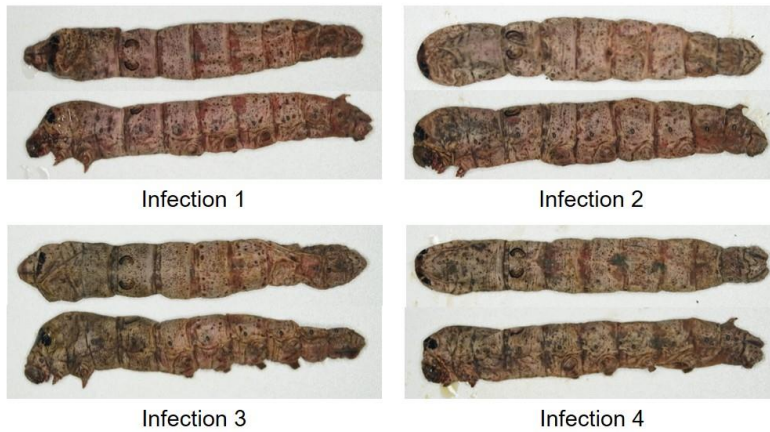

B

|                     |                                                              |     |
|---------------------|--------------------------------------------------------------|-----|
| <i>Serratia</i> sp. | -----CCAGCAGCCGCGGTA                                         | 15  |
| Infection 1         | CATCAATTGACGTTACTCGCAGAAGAAGCACCGGCTAACTCCGTGCCAGCAGCCGCGGTA | 60  |
| Infection 2         | CATCAATTGACGTTACTCGCAGAAGAAGCACCGGCTAACTCCGTGCCAGCAGCCGCGGTA | 60  |
| Infection 3         | CATCAATTGACGTTACTCGCAGAAGAAGCACCGGCTAACTCCGTGCCAGCAGCCGCGGTA | 60  |
| Infection 4         | CATCAATTGACGTTACTCGCAGAAGAAGCACCGGCTAACTCCGTGCCAGCAGCCGCGGTA | 60  |
|                     | *****                                                        |     |
| <i>Serratia</i> sp. | ATACGGAGGGTGCAAGCGTTAATCGGAATTACTGGGCGTAAAGCGCACGCAGGCGGTTTG | 75  |
| Infection 1         | ATACGGAGGGTGCAAGCGTTAATCGGAATTACTGGGCGTAAAGCGCACGCAGGCGGTTTG | 120 |
| Infection 2         | ATACGGAGGGTGCAAGCGTTAATCGGAATTACTGGGCGTAAAGCGCACGCAGGCGGTTTG | 120 |
| Infection 3         | ATACGGAGGGTGCAAGCGTTAATCGGAATTACTGGGCGTAAAGCGCACGCAGGCGGTTTG | 120 |
| Infection 4         | ATACGGAGGGTGCAAGCGTTAATCGGAATTACTGGGCGTAAAGCGCACGCAGGCGGTTTG | 120 |
|                     | *****                                                        |     |
| <i>Serratia</i> sp. | TTAAGTCAGATGTGAAATCCCCGGGCTCAACCTGGGAAGTGCATTTGAAACTGGCAAGCT | 135 |
| Infection 1         | TTAAGTCAGATGTGAAATCCCCGGGCTCAACCTGGGAAGTGCATTTGAAACTGGCAAGCT | 180 |
| Infection 2         | TTAAGTCAGATGTGAAATCCCCGGGCTCAACCTGGGAAGTGCATTTGAAACTGGCAAGCT | 180 |
| Infection 3         | TTAAGTCAGATGTGAAATCCCCGGGCTCAACCTGGGAAGTGCATTTGAAACTGGCAAGCT | 180 |
| Infection 4         | TTAAGTCAGATGTGAAATCCCCGGGCTCAACCTGGGAAGTGCATTTGAAACTGGCAAGCT | 180 |
|                     | *****                                                        |     |
| <i>Serratia</i> sp. | AGAGTCTCGTAGAGGGGGGTAGAATTCAGGTGTAGCGGTGAAATGCGTAGAGATCTGGA  | 195 |
| Infection 1         | AGAGTCTCGTAGAGGGGGGTAGAATTCAGGTGTAGCGGTGAAATGCGTAGAGATCTGGA  | 240 |
| Infection 2         | AGAGTCTCGTAGAGGGGGGTAGAATTCAGGTGTAGCGGTGAAATGCGTAGAGATCTGGA  | 240 |
| Infection 3         | AGAGTCTCGTAGAGGGGGGTAGAATTCAGGTGTAGCGGTGAAATGCGTAGAGATCTGGA  | 240 |
| Infection 4         | TGAGTCTCGTAGAGGGGGGTAGAATTCAGGTGTAGCGGTGAAATGCGTAGAGATCTGGA  | 240 |
|                     | *****                                                        |     |
| <i>Serratia</i> sp. | GGAATACCGGTGGCGAAGGCGGCCCTGGACGAAGACTGACGCTCAGGTGCGAAAGCGT   | 255 |
| Infection 1         | GGAATACCGGTGGCGAAGGCGGCCCTGGACGAAGACTGACGCTCAGGTGCGAAAGCGT   | 240 |
| Infection 2         | GGAATACCGGTGGCGAAGGCGGCCCTGGACGAAGACTGACGCTCAGGTGCGAAAGCGT   | 240 |
| Infection 3         | GGAATACCGGTGGCGAAGGCGGCCCTGGACGAAGACTGACGCTCAGGTGCGAAAGCGT   | 240 |
| Infection 4         | GGAATACCGGTGGCGAAGGCGGCCCTGGACGAAGACTGACGCTCAGGTGCGAAAGCGT   | 240 |
|                     | *****                                                        |     |
| <i>Serratia</i> sp. | GGGGAGCAAACAGGATTAGATACCCTGGTAGTCCACGCTGTAAACGATGTCGATTTGGAG | 215 |
| Infection 1         | GGGGAGCAAACA-----                                            | 312 |
| Infection 2         | GGGGAGCAAACA-----                                            | 312 |
| Infection 3         | GGGGAGCAAACA-----                                            | 312 |
| Infection 4         | GGGGAGCAAACA-----                                            | 312 |
|                     | *****                                                        |     |

Figure S2. Microbial identification from silkworms re-infected with the isolated bacteria. (A) Among the silkworms re-infected with the isolated bacteria, four silkworms showing signs of disease were randomly selected. (B) Bacteria from the selected silkworms were extracted using PBS and plated on LB medium, and the most abundant morphological colonies were selected and the 16S rRNA gene sequence (the size of about 312 bp) was amplified using primers 518F and 907R and sequenced for comparison with the sequence of the infecting bacteria.
